# Dissection of Photosynthetic Electron Transport Process in Sweet Sorghum under Heat Stress

Kun Yan<sup>1,2</sup>, Peng Chen<sup>1,5</sup>, Hongbo Shao<sup>1,3,4\*</sup>, Chuyang Shao<sup>2</sup>, Shijie Zhao<sup>2</sup>, Marian Brestic<sup>4</sup>

**1** Key Laboratory of Coastal Biology & Bioresources Utilization, Yantai Institute of Coastal Zone Research (YIC), Chinese Academy of Sciences (CAS), Yantai, China, **2** State Key Lab of Crop Biology, Shandong Agriculture University, Tai'an, China, **3** Institute for Life Sciences, Qingdao University of Science & Technology, Qingdao, China, **4** Department of Plant Physiology, Slovak University of Agriculture in Nitra, Nitra, Slovakia, **5** The Graduate University of Chinese Academy of Sciences, Beijing, China

## Abstract

Plant photosynthesis and photosystem II (PSII) are susceptible to high temperature. However, photosynthetic electron transport process under heat stress remains unclear. To reveal this issue, chlorophyll a fluorescence and modulated 820 nm reflection were simultaneously detected in sweet sorghum. At 43°C, J step in the chlorophyll a fluorescence transient was significantly elevated, suggesting that electron transport beyond primary quinone of PSII (Q<sub>A</sub>) (primary quinone electron acceptor of PSII) was inhibited. PSI (Photosystem I) photochemical capacity was not influenced even under severe heat stress at 48°C. Thus, PSI oxidation was prolonged and PSI re-reduction did not reach normal level. The inhibition of electron transport between PSII and PSI can reduce the possibility of PSI photoinhibition under heat stress. PSII function recovered entirely one day after heat stress at 43°C, implying that sweet sorghum has certain self-remediation capacity. When the temperature reached 48°C, the maximum quantum yield for primary photochemistry and the electron transport from PSII donor side were remarkably decreased, which greatly limited the electron flow to PSI, and PSI re-reduction suspended. The efficiency of an electron transferred from the intersystem electron carrier (plastoquinol, PQH<sub>2</sub>) to the end electron acceptors at the PSI acceptor side increased significantly at 48°C, and the reason was the greater inhibition of electron transport before PQH<sub>2</sub>. Thus, the fragment from Q<sub>A</sub> to PQH<sub>2</sub> is the most heat sensitive in the electron transport chain between PSII and PSI in sweet sorghum.

**Citation:** Yan K, Chen P, Shao H, Shao C, Zhao S, et al. (2013) Dissection of Photosynthetic Electron Transport Process in Sweet Sorghum under Heat Stress. PLoS ONE 8(5): e62100. doi:10.1371/journal.pone.0062100

**Editor:** Joel M. Schnur, George Mason University, United States of America

**Received:** February 2, 2013; **Accepted:** March 15, 2013; **Published:** May 24, 2013

**Copyright:** © 2013 Yan et al. This is an open-access article distributed under the terms of the Creative Commons Attribution License, which permits unrestricted use, distribution, and reproduction in any medium, provided the original author and source are credited.

**Funding:** This work was jointly supported by the National Natural Science Foundation of China (41201292; 41171216), One Hundred-Talent Plan of Chinese Academy of Sciences (CAS), the Opening Foundation of the State Key Lab of Crop Biology, Shandong Agriculture University (2011KF02), the Chinese Academy of Sciences (CAS) Visiting Professorship for Senior International Scientists (2012T1Z0010), the Science & Technology Development Plan of Shandong Province (2010GSF10208), the Science & Technology Development Plan of Yantai City (2011016), the CAS/SAFEA International Partnership Program for Creative Research Teams, The Strategic Priority Research Program of the Chinese Academy of Sciences (XDA01020304), Yantai Double-Hundred High-end Talent Plan (XY-003-02) and 135 Development Plan of YIC-CAS. The funders had no role in study design, data collection and analysis, decision to publish, or preparation of the manuscript.

**Competing Interests:** The authors have declared that no competing interests exist.

\* E-mail: shaohongbochu@126.com

## Introduction

As a result of greenhouse effect, global warming is predicted to persist in the future, and an increased frequency of periods with exceptionally high temperatures is one of the most important characteristics of global warming [1]. Heat stress is generally defined as a rapid and great elevation in ambient temperature [2]. Unlike moderate high temperature stress, a short period of heat stress is enough to provoke severe cellular injury.

Photosynthesis is susceptible to high temperature, and high temperature is liable to impair photosynthetic apparatus in plants [3]. Photosynthetic electron transport from water to NADP<sup>+</sup> is driven by photosystem II (PSII) and photosystem I (PSI). PSII is highly sensitive to high temperature, and heat-induced injury on PSII certainly can inhibit photosynthetic electron transport [2,3]. However, it is still unclear about the responses of photosynthetic linear electron transport process, particularly the interaction between PSII and PSI in plants under heat stress. Chlorophyll a fluorescence transient (OJIP transient) has been widely used to study PSII performance in plants under environmental stresses, and it is accepted as a convenient tool to diagnose plant health status. Under high temperature stress, PSII performance usually

decreased in plants, and OJIP transient could obviously change [4–6]. In recent ten years, a series of studies have clearly revealed the biological meanings of kinetic phases in this transient [7–9]. In addition, PSI redox change can be detected by the change in modulated 820 nm reflection, as they significantly correlate with each other [8]. At present, simultaneous detecting OJIP and 820 nm reflection transients served as a feasible way to explore photosynthetic electron transport process and the interaction between PSII and PSI. By using this technique, the effects of chilling and dehydration on photosynthetic electron transport chain were recently reported in apple and cucumber leaves [10,11], but responses of photosynthetic electron transport chain to heat stress remains to be elucidated.

Sweet sorghum is an annual C<sub>4</sub> crop with fast growth rate and high biomass yield. Sweet sorghum is consumed as human food and livestock feed. In addition, it is an important bio-energy crop, as the stalks are rich in fermentable sugars. To date, many studies focus on the procedure of producing bio-energy with sweet sorghum as materials (e.g., [12–14]) under the tendency of gradual shrink of ordinary energy source such as coal, oil and natural gas. However, a few of studies pay attention to the relationship

between environmental stresses and physiological responses in sweet sorghum, and moreover, these studies mainly associate with salt stress [15–17]. To our knowledge, effects of high temperature on sweet sorghum have not been reported. Sweet sorghum has been recognized as a promising crop species for exploiting saline land in coastal zone in China, and air temperature can rapidly rise to extremely high level in summer midday in this region due to low vegetation coverage. Therefore, heat stress studies on sweet sorghum may provide a scientific reference for the practice of saline land exploitation in coastal zone.

Djanaguiraman et al. [18] demonstrated that long-term high temperature (45 days, 40/30°C day/night) reduced photosynthetic rate and PSII photochemical efficiency in the leaves of grain sorghum. However, heat stress on plants may be different compared with long-term high temperature treatment. In this study, we aimed to explore photosynthetic electron transport process in the leaves of sweet sorghum under heat stress by simultaneously examining 820 nm reflection and chlorophyll a fluorescence.

## Materials and Methods

### Plant material and heat treatment

Seeds of sweet sorghum (*Sorghum bicolor* (L.) Moench. cv. YaJin) were immersed in 30°C water for 2 h. Then, fifty seeds were placed in each Petri dish in the dark between two sheets of filter paper at 25°C to germinate, and the filter paper was kept wet by spraying Hoagland nutrient solution (pH 5.7). After 2 days, seeds with similar buds (about 0.6 cm) were transferred to plastic pots filled with vermiculite (one bud in each pot) and grown in artificial climatic chambers (Huier, China). The photon flux density was approximately  $200 \mu\text{mol m}^{-2} \text{s}^{-1}$  (12 h per day from 07:00 to 19:00), and day/night temperature and humidity were controlled at 25/18°C and 65%. The seedlings were daily watered with Hoagland nutrient solution (pH 5.7). After 30 days, plants with uniform growth pattern (about 30 cm height and 0.8 cm diameter of the stem) were selected as experimental materials.

Heat stress treatments were conducted in artificial climatic chamber. Seedlings were subjected to 38°C, 43°C and 48°C for 2 h with the light ( $200 \mu\text{mol m}^{-2} \text{s}^{-1}$ , which was equivalent of growth light intensity), and seedlings growing at 25°C were taken as control. Five replicate seedlings were used for each treatment, and the newest fully expanded leaves were used for the following measurements.

### Analysis of photosynthetic rate

Measurement of photosynthetic rate ( $P_n$ ) was carried out by using an open photosynthetic system (LI-6400XT, Li-Cor, Lincoln, NE, USA) equipped with a LED leaf chamber (6400-02B). Photon flux density was set at  $800 \mu\text{mol m}^{-2} \text{s}^{-1}$  in leaf cuvette and the temperature,  $\text{CO}_2$  concentration and relative humidity were not controlled and depended on ambient conditions.

### Measurements of chlorophyll a fluorescence transient and modulated 820 nm reflection

The measurements were conducted by using a multifunctional plant efficiency analyzer (M-PEA, Hansatech, UK). Monitoring modulated reflection change near 820 nm is a very convenient way to follow the redox state of PSI (reaction center + plastocyanin). This instrument was elucidated by Strasser et al. [19] in detail. In this study, leaves were dark adapted for 30 min before they were measured. Dark-adapted leaves were illuminated with 1 s pulse of continuous red light (627 nm,  $5000 \mu\text{mol photons}$

$\text{m}^{-2} \text{s}^{-1}$ ) and subsequently, with 10 s far-red light (735 nm,  $200 \mu\text{mol photons m}^{-2} \text{s}^{-1}$ ). Chlorophyll a fluorescence and modulated 820 nm reflection were recorded during the illumination. At the onset of the red light illumination (0.7 ms), PSI (reaction center + plastocyanin) was entirely in reduced state. After the far-red illumination, PSI was completely oxidized. The declined amplitude of modulated 820 nm reflection intensity due to PSI redox change can reflect PSI photochemical capacity [10,20].

Chlorophyll a fluorescence transients were quantified according to the JIP test by using the following original data: (1) fluorescence intensity at 20  $\mu\text{s}$  ( $F_o$ , when all reaction centers of PSII are open); (2) the maximum fluorescence intensity ( $F_m$ , when all reaction centers of PSII are closed) and (3) fluorescence intensities at 300  $\mu\text{s}$  (K step), 2 ms (J step) and 30 ms (I step). Using these original data, some parameters can be calculated for quantifying PSII behavior [19]. These parameters are listed in Table 1.

### Statistical analysis

One-way ANOVA was carried out using SPSS 16.0 (SPSS Inc., Chicago, IL, USA) for all sets of data, and significant differences between means were determined through LSD test. Differences were considered statistically significant when  $P < 0.05$ .

## Results

### Effects of heat stress on relative variable chlorophyll a fluorescence and 820 nm transmission transients

As shown in Fig. 1, chlorophyll a fluorescence and 820 nm reflection transients were not affected by heat stress at 38°C. J step was significantly elevated at 43°C, and chlorophyll a fluorescence transient changed greatly at 48°C (Fig. 1A).

The modulated 820 nm reflection signals are presented by  $\text{MRt}/\text{MR}_0$  ratio (Fig. 1B).  $\text{MRt}$  indicates modulated 820 nm reflection intensity at time t, and  $\text{MR}_0$  is the value at the onset of actinic illumination (at 0.7 ms). Decrease in  $\text{MRt}/\text{MR}_0$  from  $\text{MR}_0$  (at 0.7 ms) to the minimal value (at about 12 ms) reflects PSI oxidation process. The minimal value point is a transitory steady state with equal oxidation and re-reduction rate of PSI. Subsequently, increase in  $\text{MRt}/\text{MR}_0$  indicates PSI re-reduction. PSI oxidation amplitude increased at 43°C, and the following re-reduction did not reach the normal level at 25°C (Fig. 1B). Under the severe stress at 48°C, 820 nm reflection transient changed greatly, and PSI re-reduction nearly suspended (Fig. 1B).

### Effects of heat stress on photosynthetic rate, PSII performance and PSI photochemical capacity

$P_n$  and  $\text{PI}(\text{abs})$  (PSII performance index on absorption basis) were significantly decreased by heat stress at 43°C ( $P < 0.05$ ), and the decrease become greater at 48°C ( $P < 0.05$ ) (Fig. 2A and B). In contrast, PSI photochemical capacity was not inhibited by heat stress even at 48°C (Fig. 2C).

### Effects of heat stress on PSII behaviors

At 48°C,  $\text{RC}/\text{ABS}$  significantly decreased ( $P < 0.05$ ), whereas  $V_k$  (relative variable fluorescence intensity at 300  $\mu\text{s}$ ) increased significantly ( $P < 0.05$ ) (Fig. 3).  $V_j$  and  $V_i$  remarkably increased at 43°C ( $P < 0.05$ ), whereas  $\text{TR}_o/\text{ABS}$  (maximum quantum yield for primary photochemistry) and  $\text{ET}_o/\text{TR}_o$  (probability that an electron moves further than  $Q_A$ ) significantly decreased ( $P < 0.05$ ), and the decrease became greater at 48°C (Fig. 3).

**Table 1.** Formulae and terms used in the analysis of the OJIP fluorescence transient.

| Data extracted from the recorded fluorescence transient OJIP           |                                                                                                                                                    |
|------------------------------------------------------------------------|----------------------------------------------------------------------------------------------------------------------------------------------------|
| $F_t$                                                                  | Fluorescence intensity at time t after onset of actinic illumination                                                                               |
| $F_o = F_{20 \mu s}$                                                   | Minimal recorded fluorescence intensity                                                                                                            |
| $F_k = F_{300 \mu s}$                                                  | Fluorescence intensity at 300 $\mu s$                                                                                                              |
| $F_j = F_{2ms}$                                                        | Fluorescence intensity at the J step                                                                                                               |
| $F_i = F_{30 ms}$                                                      | Fluorescence intensity at the I step                                                                                                               |
| $F_m = F_p$                                                            | Maximal recorded fluorescence intensity                                                                                                            |
| Fluorescence parameters derived from the extracted data                |                                                                                                                                                    |
| $V_t = (F_t - F_o) / (F_m - F_o)$                                      | Relative variable fluorescence at time t                                                                                                           |
| $V_k = (F_k - F_o) / (F_m - F_o)$                                      | Relative variable fluorescence intensity at 300 $\mu s$                                                                                            |
| $V_j = (F_j - F_o) / (F_m - F_o)$                                      | Relative variable fluorescence intensity at J step                                                                                                 |
| $V_i = (F_i - F_o) / (F_m - F_o)$                                      | Relative variable fluorescence intensity at I step                                                                                                 |
| Biological parameters derived from the fluorescence parameters         |                                                                                                                                                    |
| $TRo/ABS = 1 - F_o/F_m$                                                | Maximum quantum yield for primary photochemistry                                                                                                   |
| $ETo/TRo = 1 - V_j$                                                    | Probability that an electron moves further than $Q_A$                                                                                              |
| $REo/ETo = (1 - V_i) / (1 - V_j)$                                      | Probability with which an electron from the intersystem electron carriers is transferred to reduce end electron acceptors at the PSI acceptor side |
| $RC/ABS = M_o(1/V_j)(ABS/TRo)$                                         | $Q_A$ reducing reaction centers per PSII antenna chlorophyll                                                                                       |
| $PI(abs) = RC/ABS \cdot [TRo / (ABS - TRo)] \cdot [ETo / (TRo - ETo)]$ | Performance index for energy conservation from photons absorbed by PSII to the reduction of intersystem electron acceptors                         |

$Q_A$ : primary quinone; PSI: photosystem I; PSII: photosystem II.  
doi:10.1371/journal.pone.0062100.t001

### Recovery of photosynthetic apparatus one day after heat stress

$PI(abs)$ ,  $V_j$ (relative variable fluorescence intensity at 2 ms),  $V_i$ (relative variable fluorescence intensity at 30 ms),  $TRo/ABS$

and  $ETo/TRo$  recovered to the normal level (25°C) one day after heat stress at 43°C for 2 h (Table. 2). However, no recovery was observed in  $PI(abs)$ ,  $TRo/ABS$ ,  $ETo/TRo$ ,  $V_k$ ,  $V_j$ ,  $V_i$  and  $RC/ABS$  ( $Q_A$  reducing reaction centers per PSII antenna chlorophyl-

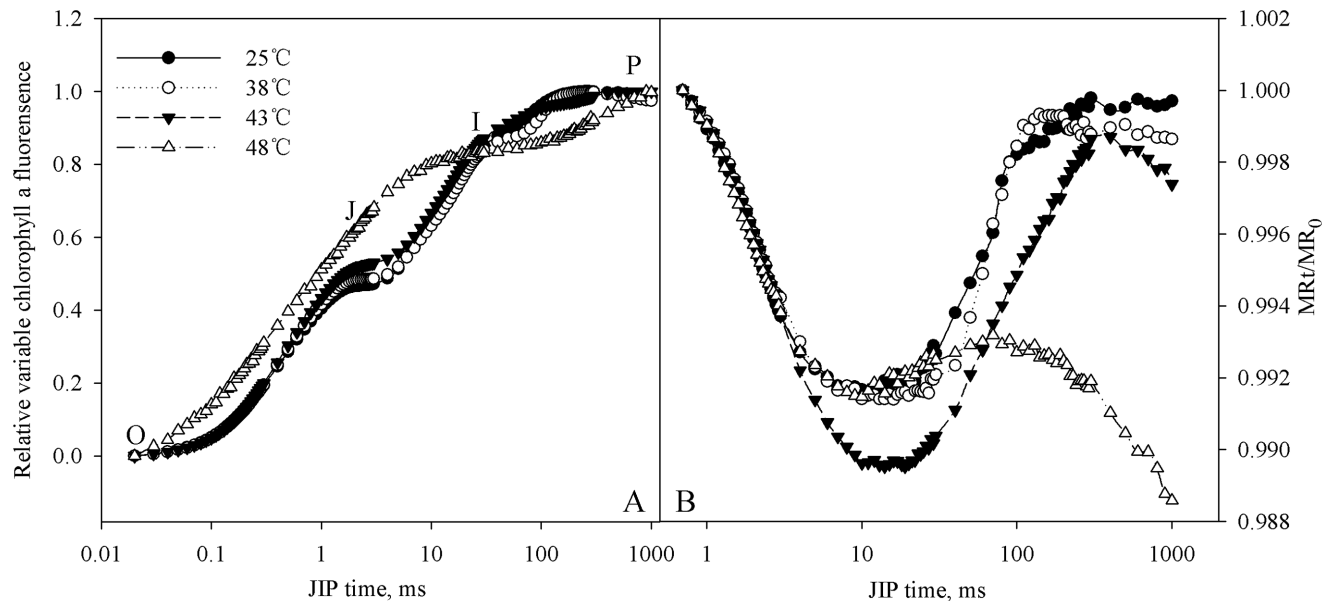

**Figure 1. Chlorophyll a fluorescence and modulated 820 nm reflection transients at high temperatures.** O, J, I and P indicate the specific steps in chlorophyll a fluorescence transient. The modulated 820 nm reflection signals are presented by  $MRT/MR_0$  ratio.  $MRT$  indicates modulated 820 nm reflection intensity at time t.  $MR_0$  is the value at the onset of actinic illumination (at 0.7 ms).

doi:10.1371/journal.pone.0062100.g001

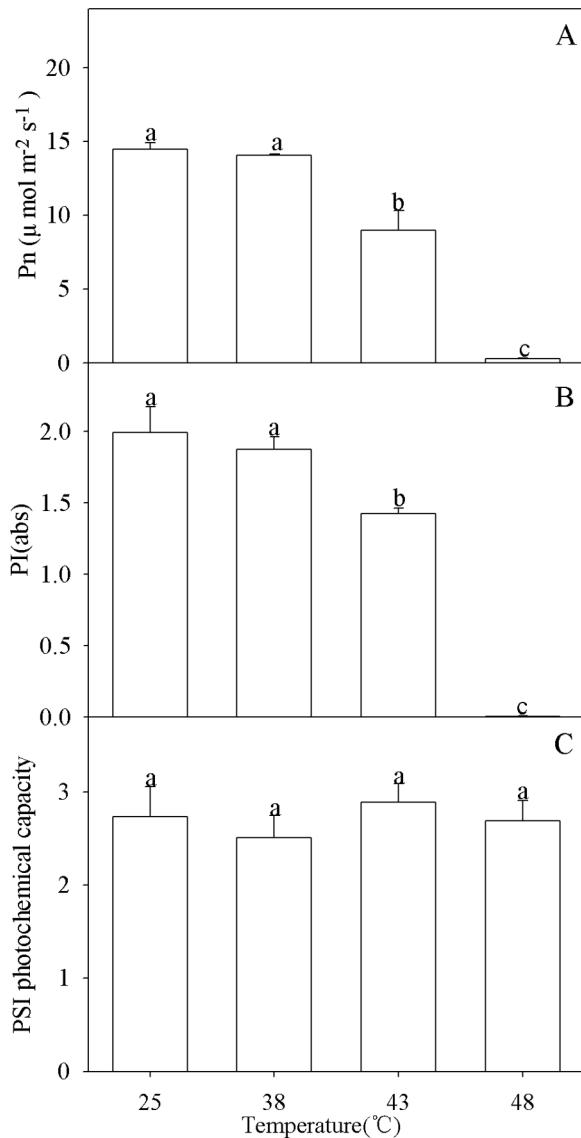

**Figure 2. (A) Photosynthetic rate (Pn), (B) PSII performance index (PI(abs)) and (C) PSI photochemical capacity at high temperatures.** Data in the figure indicate mean of five replicates ( $\pm$  SD). Different letters on error bars indicate significant difference at  $P < 0.05$ .

doi:10.1371/journal.pone.0062100.g002

one day after the severe heat stress at 48°C (Table 2), and the leaves became curly and parching and tended to die.

## Discussion

Photosynthesis and PSII were negatively affected by heat stress in sweet sorghum, as a significant decrease in Pn and PI (abs) was noted (Fig. 2A and B). In contrast, PSI photochemical capacity was not influenced by heat stress, suggesting higher heat tolerance in PSI than PSII (Fig. 2C). Heat sensitivity of photosynthesis and PSII has been extensively reported in other crops in previous studies [21–23]. However, a few studies demonstrated that PSI was more heat tolerant than PSII in *Triticum aestivum*, *Spinacia oleracea*, *Haberlea rhodopensis* and *Arabidopsis* [24–27]. This study on sweet sorghum further confirmed the heat resistance of PSI.

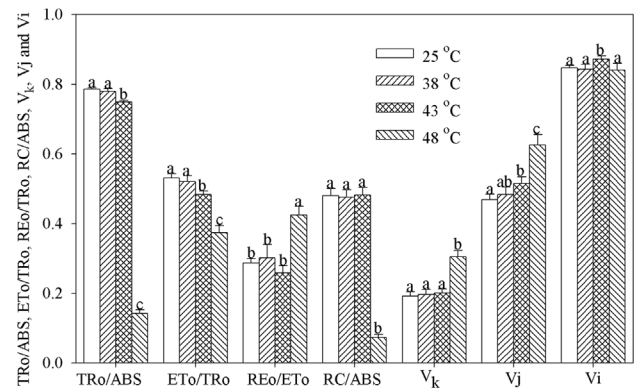

**Figure 3. TRo/ABS, ETo/TRo, REo/ETo, RC/ABS,  $V_k$ ,  $V_j$  and  $V_i$  at high temperatures.** The definition for these parameters is in Table 2. Data in the figure indicate mean of five replicates ( $\pm$  SD). Different letters on error bars indicate significant difference at  $P < 0.05$ . doi:10.1371/journal.pone.0062100.g003

When temperature rose to 43°C, PSI oxidation amplitude increased and PSI re-reduction could not reach the normal level in the first 1 s red illumination (Fig. 1B). The reason was mainly attributed to the heat-induced decrease in electron donation from PSII, and in other words, the imbalance between PSII and PSI appeared. J step suggests the kinetic bottlenecks of the electron transport chain resulting in the momentary maximum accumulation of  $Q_A^-$  [8], and I step also represents the subsequent kinetic bottlenecks of the electron transport chain but due to the limitation of plastoquinol ( $PQH_2$ ) re-oxidation [9]. Both J and I steps were elevated significantly at 43°C, suggesting that electron transport beyond  $Q_A$  and beyond  $PQH_2$  were both inhibited, and consequently,  $ETo/TRo$  decreased significantly, however,  $REo/ETo$  (probability with which an electron from the intersystem electron carriers is transferred to reduce end electron acceptors at the PSI acceptor side.) did not change at this temperature and even increased greatly at 48°C (Fig. 3).  $REo/ETo$  depends on the electrons transferred to PSI from  $PQH_2$  and the electron influx from upper electron carrier. Heat-induced increase in  $REo/ETo$  resulted from the less electrons donated to reduce  $PQH_2$ . Thus, the electron transport chain beyond  $PQH_2$  is less sensitive to heat stress than that from  $Q_A$  to  $PQH_2$  in sweet sorghum.

Oxygen-evolving complex (OEC) is considered as the most heat sensitive component of PSII [3]. Increase in  $V_k$  is a specific indicator for heat-induced damage to OEC [28,29]. No significant change in  $V_k$  at 43°C (Fig. 3) indicated that OEC was not affected and the electron transport from PSII donor side to PSII reaction center was not inhibited. In disagreement with previous studies

**Table 2. Recovery of PI(abs), TRo/ABS,  $V_k$ ,  $V_j$ ,  $V_i$  and RC/ABS in the leaves one day after heat stress at 43°C and 48°C for 2 h.**

| Parameters | Control (25°C)     | 43°C for 2 h       | 48°C for 2 h         |
|------------|--------------------|--------------------|----------------------|
| PI(abs)    | 1.99 $\pm$ 0.18a   | 1.92 $\pm$ 0.20a   | 0.0066 $\pm$ 0.0020b |
| TRo/ABS    | 0.79 $\pm$ 0.0034a | 0.78 $\pm$ 0.0013a | 0.14 $\pm$ 0.020b    |
| $V_k$      | 0.19 $\pm$ 0.012a  | 0.20 $\pm$ 0.013a  | 0.35 $\pm$ 0.038b    |
| $V_j$      | 0.47 $\pm$ 0.013a  | 0.47 $\pm$ 0.019a  | 0.72 $\pm$ 0.050b    |
| $V_i$      | 0.85 $\pm$ 0.015a  | 0.84 $\pm$ 0.013a  | 0.93 $\pm$ 0.047b    |
| RC/ABS     | 0.48 $\pm$ 0.021a  | 0.47 $\pm$ 0.012a  | 0.072 $\pm$ 0.0070b  |

[4,30], the above results illustrate that electron transport chain of PSII acceptor side is more susceptible to heat stress compared with PSII donor side in sweet sorghum. In our opinion, the conflict derives from different treatment protocol. Heat treatment was conducted in dark in previous studies, whereas heat stress in this study was performed under growth light intensity in order to make the heat treatment more physiologically relevant. Yang et al. [29] pointed out that the mechanisms of PSII inactivation were different under heat stress with and without light. High light damaged the PSII acceptor side more severely than the PSII donor side [31]. Chen et al. [32] proved that high temperature combined with light damaged the acceptor side of electron transport chain to a greater degree than high temperature alone in apple peel. Therefore, it is conceivable that electron transport in PSII acceptor side was earlier inhibited in this study. PSI photoinhibition is more dangerous than PSII photoinhibition because of the very slow recovery rate of PSI [33]. PSI photoinhibition is mainly induced by reactive oxygen species produced at the acceptor side of PSI through Mehler reaction in vivo [34]. Thus, electron flow from PSII is responsible for PSI photoinhibition, and the addition of 3-(3,4-dichlorophenyl)-1,1-dimethylurea, an inhibitor of  $Q_A$  oxidation, can completely suppress PSI photoinhibition and help PSI recovery after chilling stress [11,35]. Carbon fixation process has been proved highly susceptible to heat stress [36], which can reduce the NADPH production through linear electron transport, and in consequence, the possibility of PSI photoinhibition may rise due to more electrons transferred to Mehler reaction. Therefore, decrease in  $ET_o/TR_o$  at 43°C could help to reduce the possibility of PSI photoinhibition by limiting the production of reactive oxygen species from Mehler reaction in this study. Thus, we suppose that decrease in  $ET_o/TR_o$  is a self-protection strategy in sweet sorghum at 43°C.  $RC/ABS$  was not affected at 43°C (Fig. 3), suggesting that the effective antenna size and active reaction centers were not affected. The significant decrease in  $TR_o/ABS$  at 43°C indicated that PSII photoinhibition occurred in sorghum

## References

- Meehl GA, Stocker TF, Collins W, Friedlingstein P, Gaye A, et al. (2007) Global climate projections Climate Change 2007: The Physical Science Basis. In Qin D, Manning M, Chen Z, Marquis M, Averyt K, Tignor M, HL Miller, editors. Contribution of Working Group I to the Fourth Assessment Report of the Intergovernmental Panel on Climate Change. Cambridge University Press. 747–845.
- Wahid A, Gelani S, Ashraf M, Foolad MR (2007) Heat tolerance in plants: An overview. *Environ Exp Bot* 61: 199–223.
- Allakhverdiev SI, Kreslavski VD, Klimov VV, Los DA, Carpentier R, et al. (2008) Heat stress: an overview of molecular responses in photosynthesis. *Photosynth Res* 98: 541–550.
- Li PM, Cheng LL, Gao HY, Jiang CD, Peng T (2009) Heterogeneous behavior of PSII in soybean (*Glycine max*) leaves with identical PSII photochemistry efficiency under different high temperature treatments. *J Plant Physiol* 166: 1607–1615.
- Mathur S, Allakhverdiev SI, Jajoo A (2011) Analysis of high temperature stress on the dynamics of antenna size and reducing side heterogeneity of Photosystem II in Wheat leaves (*Triticum aestivum*). *Bba-Bioenergetics* 1807: 529–529.
- Yan K, Chen P, Shao H, Zhang L, Xu G (2011) Effects of short-term high temperature on photosynthesis and photosystem II performance in sorghum. *J Agron Crop Sci* 197: 400–408.
- Ceppi MG, Ouakroum A, Cicek N, Strasser RJ, Schansker G (2012) The IP amplitude of the fluorescence rise OJIP is sensitive to changes in the photosystem I content of leaves: a study on plants exposed to magnesium and sulfate deficiencies, drought stress and salt stress. *Physiol Plant* 144: 277–288.
- Schansker G, Srivastava A, Govindjee, Strasser RJ (2003) Characterization of the 820-nm transmission signal paralleling the chlorophyll a fluorescence rise (OJIP) in pea leaves. *Funct Plant Biol* 30: 785–796.
- Schansker G, Toth SZ, Strasser RJ (2005) Methylviologen and dibromothymoquinone treatments of pea leaves reveal the role of photosystem I in the Chl a fluorescence rise OJIP. *Biochim Biophys Acta* 1706: 250–261.
- Li PM, Ma FW (2012) Different effects of light irradiation on the photosynthetic electron transport chain during apple tree leaf dehydration. *Plant Physiol Bioch* 55: 16–22.

(Fig. 3). The declined  $TR_o/ABS$  also could be considered as positive adaptation for down-regulating the photosynthetic excited pressure, and it might be induced by the photo-protective mechanisms including non-photochemical dissipation or state transition [37–39]. The photosynthetic proteins and lipids might not be greatly affected at this temperature. PSII function recovered entirely one day after heat stress at 43°C (Table. 2), implying that sweet sorghum has certain capacity to protect itself against heat stress through physiological regulation.

When temperature reached 48°C, OEC and PSII reaction center were damaged, as increase in  $V_k$  and decrease in  $RC/ABS$  were greatly significant (Fig. 3). As a result, photosynthetic electron donation to PSI was sharply lowered, and PSI re-reduction became impossible (Fig. 1B). One day after the stress, the leaves could not recover and tended to die. The irreversible damage on PSII at this temperature should result from heat-induced protein denaturation and lipid oxidation.

In conclusion, PSI photochemical capacity was not affected by heat stress in sweet sorghum. Electron transport of PSII acceptor side was initially inhibited by heat stress, and the fragment from  $Q_A$  to  $PQH_2$  is the most heat sensitive in the electron transport chain between PSII and PSI. The decrease in electron transport between PSII and PSI may play a self-protection role in reducing the possibility of PSI photoinhibition.

## Acknowledgments

We express our sincere thanks to Prof. Huiyuan Gao for critically reading this manuscript.

## Author Contributions

Conceived and designed the experiments: HBS KY PC. Performed the experiments: KY PC CYS. Analyzed the data: KY PC. Contributed reagents/materials/analysis tools: HBS SJZ. Wrote the paper: KY HBS. Helped revise original paper: CYS MB.

- Zhang ZS, Jia YJ, Gao HY, Zhang LT, Li HD, et al. (2011) Characterization of PSI recovery after chilling-induced photoinhibition in cucumber (*Cucumis sativus* L.) leaves. *Planta* 234: 883–889.
- Ntaikou I, Gavala HN, Kornaros M, Lyberatos G (2008) Hydrogen production from sugars and sweet sorghum biomass using *Ruminococcus albus*. *Int J Hydrogen Energy* 33: 1153–1163.
- She DA, Xu F, Geng ZC, Sun RC, Jones GL, et al. (2010) Physicochemical characterization of extracted lignin from sweet sorghum stem. *Ind Crop Prod* 32: 21–28.
- Shi XX, Song HC, Wang CR, Tang RS, Huang ZX, et al. (2010) Enhanced biohydrogen production from sweet sorghum stalk with alkalization pretreatment by mixed anaerobic cultures. *Int J Energ Res* 34: 662–672.
- Almodares A, Hadi MR, Ahmadpour H (2008) Sorghum stem yield and soluble carbohydrates under different salinity levels. *Afr J Biotechnol* 7: 4051–4055.
- Chai YY, Jiang CD, Shi L, Shi TS, Gu WB (2010) Effects of exogenous spermine on sweet sorghum during germination under salinity. *Biol Plantarum* 54: 145–148.
- Koyro HW (1997) Ultrastructural and physiological changes in root cells of sorghum plants (*Sorghum bicolor* x *S-sudanensis* cv *Sweet Sioux*) induced by NaCl. *J Exp Bot* 48: 693–706.
- Djanaguiraman M, Prasad PVV, Seppanen M (2010) Selenium protects sorghum leaves from oxidative damage under high temperature stress by enhancing antioxidant defense system. *Plant Physiol Bioch* 48: 999–1007.
- Strasser RJ, Tsimilli-Michael M, Qiang S, Goltsev V (2010) Simultaneous in vivo recording of prompt and delayed fluorescence and 820 nm reflection changes during drying and after rehydration of the resurrection plant *Haberlea rhodopensis*. *Biochim Biophys Acta* 1797: 122–122.
- Yan K, Chen P, Shao HB, Zhao SJ, Zhang LH, et al. (2012) Photosynthetic characterization of Jerusalem artichoke during leaf expansion. *Acta Physiol Plant* 34: 353–360.
- Sinsawat V, Leipner J, Stamp P, Fracheboud Y (2004) Effect of heat stress on the photosynthetic apparatus in maize (*Zea mays* L.) grown at control or high temperature. *Environ Exp Bot* 52: 123–129.
- Yang XH, Chen XY, Ge QY, Li B, Tong YP, et al. (2006) Tolerance of photosynthesis to photoinhibition, high temperature and drought stress in flag

- leaves of wheat: A comparison between a hybridization line and its parents grown under field conditions. *Plant Sci* 171: 389–397.
23. Yin Y, Li S, Liao W, Lu Q, Wen X, et al. (2010) Photosystem II photochemistry, photoinhibition, and the xanthophyll cycle in heat-stressed rice leaves. *J Plant Physiol* 167: 959–966.
  24. Sayed OH, Earnshaw MJ, Emes MJ (1989) Photosynthetic responses of different varieties of wheat to high temperature. I. effect of heat stress on photosynthetic electron transport. *J Exp Bot* 40: 633–638.
  25. Boucher N, Carpentier R (1993) Heat-stress stimulation of oxygen uptake by Photosystem I involves the reduction of superoxide radicals by specific electron donors. *Photosynth Res* 35: 213–218.
  26. Mihailova G, Petkova S, Buchel C, Georgieva K (2011) Desiccation of the resurrection plant *Haberlea rhodopensis* at high temperature. *Photosynth Res* 108: 5–13.
  27. Essemine J, Govindachary S, Ammar S, Bouzid S, Carpentier R (2012) Enhanced sensitivity of the photosynthetic apparatus to heat stress in digalactosyl-diacylglycerol deficient *Arabidopsis*. *Environ Exp Bot* 80: 16–26.
  28. Wen XG, Qiu NW, Lu QT, Lu CM (2005) Enhanced thermotolerance of photosystem II in salt-adapted plants of the halophyte *Artemisia anethifolia*. *Planta* 220: 486–497.
  29. Yang XH, Wen XG, Gong HM, Lu QT, Yang ZP, et al. (2007) Genetic engineering of the biosynthesis of glycinebetaine enhances thermotolerance of photosystem II in tobacco plants. *Planta* 225: 719–733.
  30. Lu CM, Zhang JH (2000) Heat-induced multiple effects on PSII in wheat plants. *J Plant Physiol* 156: 259–265.
  31. Song YG, Liu B, Wang LF, Li MH, Liu Y (2006) Damage to the oxygen-evolving complex by superoxide anion, hydrogen peroxide, and hydroxyl radical in photoinhibition of photosystem II. *Photosynth Res* 90: 67–78.
  32. Chen LS, Li P, Cheng L (2008) Effects of high temperature coupled with high light on the balance between photooxidation and photoprotection in the sun-exposed peel of apple. *Planta* 228: 745–756.
  33. Kudoh H, Sonoike K (2002) Irreversible damage to photosystem I by chilling in the light: cause of the degradation of chlorophyll after returning to normal growth temperature. *Planta* 215: 541–548.
  34. Sonoike K (2011) Photoinhibition of photosystem I. *Physiol Plant* 142: 56–64.
  35. Sonoike K (1996) Degradation of psaB gene product, the reaction center subunit of photosystem I, is caused during photoinhibition of photosystem I: Possible involvement of active oxygen species. *Plant Sci* 115: 157–164.
  36. Salvucci ME, Crafts-Brandner SJ (2004) Relationship between the heat tolerance of photosynthesis and the thermal stability of rubisco activase in plants from contrasting thermal environments. *Plant Physiol* 134: 1460–1470.
  37. Baker NR, Harbinson J, Kramer DM (2007) Determining the limitations and regulation of photosynthetic energy transduction in leaves. *Plant Cell Environ* 30: 1107–1125.
  38. Raven JA (2011) The cost of photoinhibition. *Physiol Plant* 142: 87–104.
  39. Rochaix JD (2011) Regulation of photosynthetic electron transport. *Biochim Biophys Acta* 1807: 375–383.
